# Supplementary material for: Valve-in-valve transcatheter aortic valve replacement (TAVR) leads to lower device success compared to TAVR in native stenosis
Source: Frontiers journal article supplement (doi:10.3389/fcvm.2025.1465409), 2025-04-22
Supplement: Data_Sheet_1.pdf [file Data_Sheet_1.pdf]

| Supplementary Table 1 – Comparison baseline characteristics of ViV-TAVR and TAVR in native aortic stenosis                                                                                                                                                                                                                                                                                                                                                                                                                                                                                                                                   |                  |                                |                          |                 |
|----------------------------------------------------------------------------------------------------------------------------------------------------------------------------------------------------------------------------------------------------------------------------------------------------------------------------------------------------------------------------------------------------------------------------------------------------------------------------------------------------------------------------------------------------------------------------------------------------------------------------------------------|------------------|--------------------------------|--------------------------|-----------------|
|                                                                                                                                                                                                                                                                                                                                                                                                                                                                                                                                                                                                                                              | Total<br>N=2316  | Non-Device<br>Success<br>N=120 | Device Success<br>N=2196 | p               |
| Age, years                                                                                                                                                                                                                                                                                                                                                                                                                                                                                                                                                                                                                                   | 81.0 {77.0-85.0} | 79.0 {75.0-85.0}               | 81.0 {77.0-85.0}         | <b>&lt;0.01</b> |
| Female, N (%)                                                                                                                                                                                                                                                                                                                                                                                                                                                                                                                                                                                                                                | 1134 (49.0)      | 67 (55.8)                      | 1067 (48.6)              | 0.12            |
| BMI                                                                                                                                                                                                                                                                                                                                                                                                                                                                                                                                                                                                                                          | 27.1±4.8         | 27.8±4.8                       | 27.0±4.8                 | 0.08            |
| STS Score Risk for Mortality, %                                                                                                                                                                                                                                                                                                                                                                                                                                                                                                                                                                                                              | 3.8 {2.4-6.4}    | 3.9 {2.5-6.7}                  | 2.4 {2.4-6.4}            | 0.56            |
| AF, N (%)                                                                                                                                                                                                                                                                                                                                                                                                                                                                                                                                                                                                                                    | 888 (38.3)       | 40 (33.3)                      | 848 (38.6)               | 0.25            |
| AHT, N (%)                                                                                                                                                                                                                                                                                                                                                                                                                                                                                                                                                                                                                                   | 2051 (88.6)      | 102 (85.0)                     | 1949 (88.8)              | 0.42            |
| CAD                                                                                                                                                                                                                                                                                                                                                                                                                                                                                                                                                                                                                                          | 1440 (62.3)      | 71 (59.2)                      | 1369 (62.4)              | 0.47            |
| Diabetes mellitus                                                                                                                                                                                                                                                                                                                                                                                                                                                                                                                                                                                                                            | 678 (29.3)       | 28 (23.3)                      | 650 (29.6)               | 0.14            |
| Prior stroke/TIA                                                                                                                                                                                                                                                                                                                                                                                                                                                                                                                                                                                                                             | 279 (12.0)       | 12 (10.0)                      | 267 (12.2)               | 0.48            |
| Hb                                                                                                                                                                                                                                                                                                                                                                                                                                                                                                                                                                                                                                           | 12.3±5.1         | 12.4±1.8                       | 12.3±5.2                 | 0.76            |
| eGFR, ml/min                                                                                                                                                                                                                                                                                                                                                                                                                                                                                                                                                                                                                                 | 56.9±24.5        | 58.0±22.1                      | 56.8±24.7                | 0.63            |
| AV mPG, mmHG                                                                                                                                                                                                                                                                                                                                                                                                                                                                                                                                                                                                                                 | 39.2±15.4        | 42.2±19.1                      | 39.0±15.2                | <b>0.01</b>     |
| AVmaxPG, mmHg                                                                                                                                                                                                                                                                                                                                                                                                                                                                                                                                                                                                                                | 65.9±23.8        | 71.2±28.7                      | 65.6±23.5                | <b>0.03</b>     |
| NYHA III/IV                                                                                                                                                                                                                                                                                                                                                                                                                                                                                                                                                                                                                                  | 1730 (74.7)      | 89 (74.2)                      | 1641 (74.7)              | 0.89            |
| ViV-TAVR                                                                                                                                                                                                                                                                                                                                                                                                                                                                                                                                                                                                                                     | 100 (4.3)        | 34 (28.3)                      | 66 (3.0)                 | <b>&lt;0.01</b> |
| BEV, N (%)                                                                                                                                                                                                                                                                                                                                                                                                                                                                                                                                                                                                                                   | 1106 (47.8)      | 52 (43.3)                      | 1054 (48.0)              | 0.32            |
| Values are shown as frequencies (N) and percentages (%), mean ± standard deviation (SD) or median and interquartile range (IQR)<br>Bold values indicate significant p-values.<br>Abbreviations: AF = atrial fibrillation, AHT = arterial hypertension, AV = aortic valve, BEV = balloon-expandable valve, BMI = body mass index, CAD = coronary artery disease, eGFR = estimated glomerular filtration rate, Hb = hemoglobin level, max PG = maximum pressure gradient, mPG= mean pressure gradient, NYHA = New York Heart Association, STS = Society of Thoracic Surgeons, ViV-TAVR = Valve-in-valve transcatheter aortic valve replacement |                  |                                |                          |                 |

|                | Univariate |            |                 |  | Multivariate |            |                 |
|----------------|------------|------------|-----------------|--|--------------|------------|-----------------|
|                | OR         | 95%CI      | p               |  | OR           | 95%CI      | p               |
| Age, years     | 1.04       | 1.02-1.07  | <b>0.01</b>     |  | 1.01         | 0.99-1.046 | 0.18            |
| BMI            | 0.97       | 0.94-1.00  | 0.08            |  |              |            |                 |
| AV mPG, mmHG   | 0.99       | 0.98-0.99  | <b>0.03</b>     |  | 0.98         | 0.97-0.995 | <b>0.01</b>     |
| AV maxPG, mmHg | 0.99       | 0.98-0.99  | 0.14            |  |              |            |                 |
| ViV-TAVR       | 0.078      | 0.049-0.13 | <b>&lt;0.01</b> |  | 0.07         | 0.045-0.12 | <b>&lt;0.01</b> |

Values are shown as odds ratio (OR) and its respective 95% confidence interval (CI).  
 Bold values indicate significant p-values.  
 The multivariate model included variables significant in univariate regression. maxPG was not included in the multivariate model due to autocorrelation with meanPG.  
 Abbreviations: AV = aortic valve, max PG = maximum pressure gradient, mPG= mean pressure gradient

| <b>Supplementary Table 3- Propensity Score Matched Cohort</b>                                                                                                                                                                                                                                                                                                                                                                                                                                  |                        |                          |                              |                 |
|------------------------------------------------------------------------------------------------------------------------------------------------------------------------------------------------------------------------------------------------------------------------------------------------------------------------------------------------------------------------------------------------------------------------------------------------------------------------------------------------|------------------------|--------------------------|------------------------------|-----------------|
|                                                                                                                                                                                                                                                                                                                                                                                                                                                                                                | <b>Total<br/>N=288</b> | <b>ViV-TAVR<br/>N=96</b> | <b>Native TAVR<br/>N=192</b> | <b>p-Value</b>  |
| Device Success, N (%)                                                                                                                                                                                                                                                                                                                                                                                                                                                                          | 244 (84.7)             | 62 (64.6)                | 182 (94.8)                   | <b>&lt;0.01</b> |
| Female, N (%)                                                                                                                                                                                                                                                                                                                                                                                                                                                                                  | 126 (43.8)             | 42 (43.8)                | 84 (43.8)                    | 1.0             |
| Balloon-Expandable Valve, N (%)                                                                                                                                                                                                                                                                                                                                                                                                                                                                | 102 (35.4)             | 68 (35.4)                | 34 (35.4)                    | 1.0             |
| STS Score                                                                                                                                                                                                                                                                                                                                                                                                                                                                                      | 4.2 {2.4-8.3}          | 5.1 {2.6-8.5}            | 3.9 {2.3-8.0}                | 0.13            |
| Age, years                                                                                                                                                                                                                                                                                                                                                                                                                                                                                     | 77.0 {71.0-83.0}       | 78.0 {70.0-83.4}         | 77.0 {73.0-83.0}             | 0.61            |
| AV meanPG, mmHg                                                                                                                                                                                                                                                                                                                                                                                                                                                                                | 35.8±15.5              | 36.0±16.8                | 35.7±14.8                    | 0.87            |
| AV maxPG, mmHg                                                                                                                                                                                                                                                                                                                                                                                                                                                                                 | 61.5±24.6              | 62.2±27.3                | 61.1±23.2                    | 0.72            |
| <p>Values are shown as frequencies (N) and percentages (%), mean ± standard deviation (SD) or median and interquartile range (IQR)</p> <p>Bold values indicate significant p-values.</p> <p>1:2 propensity score matching was conducted (ViV-TAVR vs. TAVR in native stenosis) using the variables which differed significantly between ViV-TAVR and TAVR in native stenosis patients (see Table 1).</p> <p>Abbreviations: mPG= mean pressure gradient, max PG = maximum pressure gradient</p> |                        |                          |                              |                 |
